# 1 **Elevated blood creatinine -a biomarker of renal function- associates** 2 **with multiple metabolic perturbations in dogs**

3 Claudia Ottka<sup>1,2,3</sup>, Katariina Vapalahti<sup>1,2</sup>, Ann-Marie Määttä<sup>4</sup>, Nanna Huuskonen<sup>4</sup>, Sinikka  
4 Sarpanen<sup>5</sup>, Liisa Jalkanen<sup>6</sup>, Hannes Lohi<sup>1,2,3</sup>.

5 <sup>1</sup> PetBIOMICS Ltd., Helsinki, Finland

6 <sup>2</sup> Department of Veterinary Biosciences and Department of Medical and Clinical Genetics,  
7 University of Helsinki, Helsinki, Finland

8 <sup>3</sup> Folkhälsan Research Center, Helsinki, Finland

9 <sup>4</sup> Movet Ltd., Kuopio, Finland

10 <sup>5</sup> Kuopion Eläinlääkärikeskus Ltd., Kuopio, Finland

11 <sup>6</sup> Pieneläinvastaanotto Punaturkki Ltd., Kuopio, Finland

12

13 **BACKGROUND:** Renal diseases, such as chronic kidney disease (CKD) are common in dogs.  
14 While the kidneys have multiple important metabolic functions, the occurrence of metabolic  
15 disturbances in canine renal diseases has not been extensively studied.

16 **OBJECTIVES:** To identify metabolic changes in blood samples exhibiting elevated blood  
17 creatinine, indicating reduced renal filtration.

18 **ANIMALS:** Samples consisted of clinical samples analysed by a <sup>1</sup>H NMR-based metabolomics  
19 platform. The case group included 23 samples with creatinine > 125 µmol/l, and the control  
20 group 873 samples with creatinine within the reference interval.

21 **METHODS:** Biomarker association with elevated creatinine was evaluated utilizing three  
22 statistical approaches: Wilcoxon rank-sum test and logistic regression analysis (FDR-corrected  
23 p-values), and classification using random forest. Means of the biomarkers were compared to  
24 reference intervals. A heatmap and histograms visualized the differences.

25 **RESULTS:** The levels of citrate, tyrosine, branched-chain amino acids, valine, leucine, albumin,  
26 linoleic acid % and the ratio of phenylalanine to tyrosine differed significantly both in the  
27 Wilcoxon test and logistic regression, acetate levels only in Wilcoxon test and  
28 docosapentaenoic acid % only in logistic regression ( $p < .05$ ). The ten most significant markers  
29 in random forest corresponded to the Wilcoxon test, supplemented with alanine.

30 **CONCLUSIONS AND CLINICAL IMPORTANCE:** This study identified multiple metabolic  
31 changes associated with elevated blood creatinine, including prospective diagnostic markers  
32 and therapeutic targets. The NMR metabolomics test is a promising tool for improving  
33 diagnostics and management of canine renal diseases. Further research is needed to verify the  
34 association of these changes to the canine patient's clinical state.

## 35 Introduction

36 Renal diseases are common in dogs, and are frequent causes of death. Renal disease is either  
37 viewed as acute or chronic, although these two can occur simultaneously and both increase the  
38 susceptibility to the other. Chronic kidney disease (CKD) is characterized by gradual renal  
39 damage, whereas acute kidney injury (AKI) is characterized by an abrupt decline in renal  
40 function. Renal damage in AKI can be reversible, whereas renal damage in CKD is typically  
41 irreversible. CKD is considered the most common renal disease in dogs, with an estimated  
42 prevalence of 0,37%<sup>1</sup>.

43 The blood creatinine concentration is a clinical biochemistry measure commonly used as a  
44 determinant of renal glomerular filtration rate. The International Renal Interest Society (IRIS)  
45 has created widely used guidelines both for the staging and treatment of CKD, and grading of  
46 AKI<sup>2-4</sup>. In these guidelines, grading of AKI is based on glomerular filtration capacity evaluated  
47 using the blood creatinine concentration and the presence of other clinical evidence of AKI, with  
48 further classification based on urine formation and need of renal replacement therapy<sup>2</sup>. The  
49 staging of CKD is based on the glomerular filtration capacity measured as blood creatinine or  
50 symmetric dimethylarginine, with further classification based on proteinuria and blood pressure<sup>4</sup>.  
51 Treatment guidelines are based on CKD staging, clinical signs, and plasma phosphate  
52 concentrations, as well as on possible complications; metabolic acidosis, anemia, and  
53 dehydration<sup>3</sup>.

54 However, the metabolic functions of the kidneys range further than this. Multiple additional  
55 metabolic derangements, such as impaired renal enzymatic activity<sup>5</sup>, have been found to occur  
56 in both human and animal renal diseases. Some of these changes have even been proposed as  
57 therapeutic targets<sup>6-9</sup>. However, the occurrence and significance of changes in systemic  
58 metabolism have not yet been extensively studied in dogs. Moreover, traditional diagnostic  
59 approaches do not detect the majority of these metabolic changes, hindering their use in clinical  
60 practice. We have recently developed and validated a clinically usable NMR metabolomics  
61 testing platform for dogs<sup>10</sup>, offering the technology for a holistic approach to both veterinary  
62 research and clinical practice.

63 The objective of this study was to evaluate the systemic metabolic changes occurring in dogs  
64 with elevated blood creatinine concentrations, indicating reduced renal filtration, and to discuss  
65 the possibility of these changes to be used as diagnostic biomarkers and therapeutic targets of  
66 renal diseases.

## 67 **Materials and methods**

### 68 **Samples**

69 The workflow for the study is summarized and presented in Fig 1. The study was performed as  
70 a retrospective review of clinical blood samples. The samples originated from two sources, first:

71 Diagnostic sample material (n = 1026) taken by Finnish veterinarians, submitted by mail to a  
72 single laboratory provider (Movet Ltd., Kuopio, Finland). Altogether 999 of these samples were  
73 collected and sent during 2/2018 - 5/2018, and previously used in the method validation of the  
74 canine NMR metabolomics platform<sup>10</sup>, and 27 were collected and sent during 10/2018 - 2/2019  
75 together with the samples from source 2 as described below. No clinical data was available for  
76 these samples. Signalment data was either fully missing or limited to the breed definition. Both  
77 heparin plasma and serum samples were included, and the individual sample type of each  
78 sample was unknown.

79 The second source included clinical samples (n = 455) collected at two Veterinary clinics  
80 (Kuopion Eläinlääkärikeskus Ltd., Kuopio, Finland and Pieneläinvastaanotto Punaturkki Ltd.,  
81 Kuopio, Finland) during the NMR metabolomics clinic pilot. Samples were collected during  
82 routine veterinary appointments, and sent to NMR analysis between 10/2018 - 2/2019. Limited  
83 disease data and signalment data were available for these samples. All samples were heparin  
84 plasma samples.

85 The samples were analyzed by a validated canine <sup>1</sup>H NMR metabolomics platform<sup>10</sup> quantifying  
86 123 biomarkers.

87 Case and control groups were created according to their NMR-measured creatinine  
88 concentrations. To limit possible confounding factors, clinical data was reviewed for samples, for  
89 which it was available. No samples were excluded based on clinical data. Since CKD is the  
90 most common renal disease in dogs, we used creatinine concentrations from IRIS CKD staging  
91 guidelines as inclusion criteria to the case group. Inclusion in the case group was based on the  
92 creatinine measurement being above 125 µmol/l, indicating CKD stage 2 or higher<sup>4</sup>.

93 The first inclusion criteria for the control group was the NMR-measured creatinine concentration  
94 being within the creatinine reference interval (32 - 103 µmol/l) of the NMR-method<sup>10</sup>. To  
95 minimize the confounding effect of preanalytical variability caused by sample handling, our  
96 second inclusion criteria was to include control group samples from different sample sets in a  
97 similar ratio as cases.

### 98 **Ethical Approval**

99 The study was performed as a retrospective evaluation of clinical blood samples and leftovers of  
100 clinical samples. All applicable international, national, and/or institutional guidelines for the care  
101 and use of animals were followed. All procedures performed in studies involving animals were in  
102 accordance with the ethical standards of the institution or practice at which the studies were  
103 conducted. Committee: Finnish national Animal Experiment Board, permit number:  
104 ESAVI/7482/04.10.07/2015. Permission for scientific use was obtained for all samples.

105

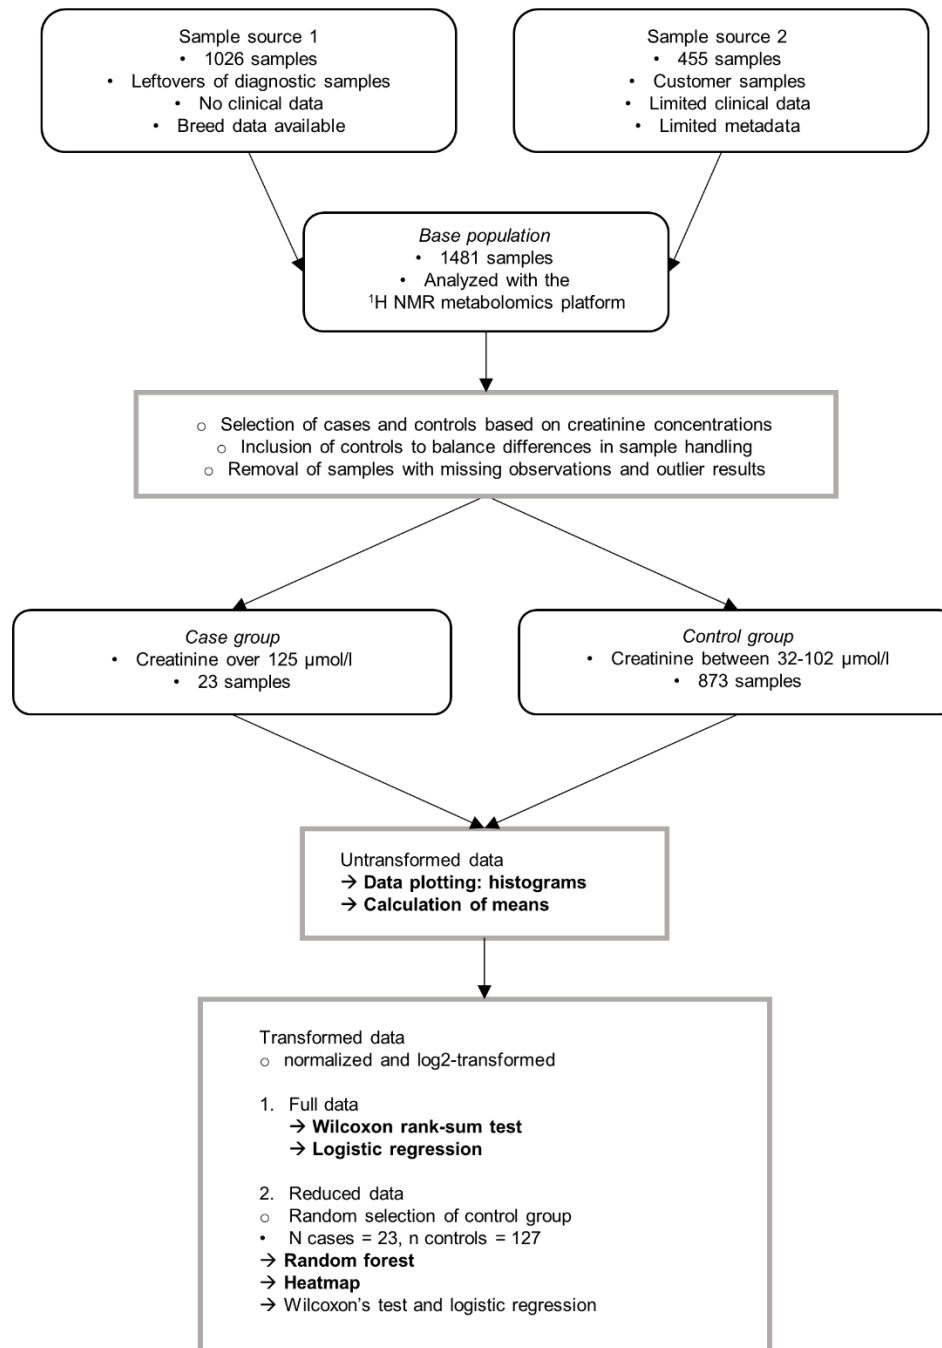

106

107 Figure 1. Study workflow. Rounded boxes include information on materials, boxes information on methods. Black  
108 points represent sample characteristics and circles represent data handling procedures. Arrows represent statistical  
109 analyses, and analyses primarily evaluated in this article are in bold.

## 110 **Statistical analysis**

111 The data was evaluated for missing observations. We removed biomarkers with multiple  
112 missing observations and samples with missing observations. Two samples in the case group  
113 showed marked lipemia with the measured triglyceride concentration of over 7 mmol/l. In order  
114 to remove skewness caused by these lipemic samples, we removed these samples from further  
115 analyses as potential outliers. The resulting case group consisted of 23 samples and control  
116 group of 873 samples.

117 We used three different statistical approaches to identify metabolite association with elevated  
118 creatinine concentrations. Before conducting statistical analyses, the data was normalized and  
119 log<sub>2</sub>-transformed to reduce bias and to balance the data. The three statistical approaches  
120 included

- 121 i) Wilcoxon rank-sum test with FDR-corrected p-values to evaluate the significance of  
122 differences between case and control groups' analyte concentrations,
- 123 ii) separate logistic regression models for each biomarker to evaluate the metabolite's  
124 association to elevated creatinine concentrations. The case-control status served as the  
125 response variable and the individual metabolite as the independent variable. To control the  
126 Type I errors in multiple testing, we used FDR p-value correction. Linearity between the  
127 metabolites and log odds were tested. The goodness of fit and predictive value of the models  
128 were assessed by AIC and AUC values – a lower AIC indicates better fit and a higher AUC a  
129 better predictive value.
- 130 iii) random forest classification to identify the biomarkers, that predicted best the elevated  
131 creatinine concentrations. To balance the difference in number of cases and controls, control  
132 group size was reduced by random undersampling to 127 samples. Biomarker association with  
133 elevated creatinine concentrations was assessed by variable importance.

134 To check, whether metabolite association with elevated creatinine concentrations is the same  
135 using the reduced and full control groups, we performed the Wilcoxon rank-sum test and logistic  
136 regression analysis also with the reduced control group.

137 A heatmap was created to visualize the results of the biomarkers associated with elevated  
138 creatinine concentrations based on the Wilcoxon rank-sum test, logistic regression and random  
139 forest, using the reduced data of 127 samples.

140 To determine the direction of the observed changes and to evaluate, whether the changes  
141 would be detected in clinical diagnostics based on reference intervals, we compared the means  
142 of the case and control groups to each other and to analysis reference intervals. We evaluated,  
143 whether the means of untransformed metabolite values and their 95 % confidence intervals (CI)  
144 in the case group markedly differ from the reference intervals of the NMR method<sup>8</sup>, and their  
145 90% CI.

146 To visualize the analyte concentrations in the case and control group compared to reference  
147 intervals of the NMR method, we plotted histograms of the analytes. Potential outliers were  
148 removed from the control group to ensure optimal histogram scaling.

149 All statistical analyses conducted throughout this study were performed by SAS version 9.4,  
150 SAS Institute Inc., Cary, NC, USA, RStudio Team (2019). RStudio: Integrated Development for  
151 R. RStudio, Inc., Boston, MA URL <http://www.rstudio.com/> and Microsoft Office Excel, Microsoft  
152 Corp., Redmond, WA, US.

## 153 Results

### 154 Sample characteristics

155 In this study, we used a non-targeted <sup>1</sup>H NMR metabolomics approach to compare metabolite  
156 profiles of clinical samples with elevated creatinine concentrations (n = 23) to clinical samples  
157 with normal creatinine concentrations (n = 873). The median creatinine concentration in the  
158 case group was 196 μmol/l, with a range of 131 - 646 μmol/l. The median creatinine  
159 concentration in the control group was 60 μmol/l with a range of 32 - 102 μmol/l. Since most of  
160 the used samples were leftovers of clinical laboratory samples, limited signalment and clinical  
161 data was available. Breed was unknown for 10 (43.5 %) of the case group and 186 (21.3 %) of  
162 the control group samples (Table 1). The remaining 13 samples in the case group were taken  
163 from dogs of 12 different breeds. The control group samples were taken from dogs of 155  
164 different breeds, including also 8 % of mixed breed dogs.

165 Table 1. Summary of the most common breeds in the case and control groups.

| Cases                              |      | Controls                           |      |
|------------------------------------|------|------------------------------------|------|
| Breed                              | %    | Breed                              | %    |
| Unknown                            | 43.5 | Unknown                            | 21.3 |
| Lagotto Romagnolo                  | 8.7  | Mixed breed                        | 8.0  |
| Poodle                             | 4.3  | Labrador Retriever                 | 3.8  |
| Nova Scotia Duck Tolling Retriever | 4.3  | German Shepherd Dog                | 2.7  |
| Bichon Frise                       | 4.3  | Golden Retriever                   | 2.4  |
| Bernese Mountain Dog               | 4.3  | Shetland Sheepdog                  | 2.2  |
| Schapendoes                        | 4.3  | Finnish Lapphund                   | 2.2  |
| Collie Rough                       | 4.3  | Poodle                             | 1.9  |
| Miniature Pinscher                 | 4.3  | Spanish Water Dog                  | 1.8  |
| Cavalier King Charles Spaniel      | 4.3  | Jack Russell Terrier               | 1.6  |
| American Staffordshire Terrier     | 4.3  | Nova Scotia Duck Tolling Retriever | 1.5  |
| Dogue de Bordeaux                  | 4.3  | Swedish Elkhound                   | 1.3  |
| Bouvier des Flandres               | 4.3  | Finnish Hound                      | 1.3  |
|                                    |      | Miniature Schnauzer                | 1.1  |
|                                    |      | Bichon Frise                       | 1.1  |

166 The table shown 15 most common breeds in the case and control groups, including samples with unknown breed and  
167 mixed breeds. The total number of case group samples was 23, and control group samples was 873. The total  
168 number of breeds in the control group was 155, including mixed breed dogs, and 45,8 % of the control group samples  
169 were taken from breeds not included in the 15 most common breeds in the control group.

170 The used NMR metabolomics platform quantitates 123 biomarkers. Biomarkers with multiple  
171 missing observations were excluded from further analyses, resulting in 97 analyzed biomarkers  
172 (Supplementary Table 1).

### 173 Results of the statistical association tests

174 The Wilcoxon rank-sum test, logistic regression analysis and classification using random forest  
175 identified similar biomarkers (Table 2, Fig 2).

176 Citrate, tyrosine, branched-chain amino acids (BCAA), valine, leucine, albumin, acetate, linoleic  
177 acid % and the ratio of phenylalanine to tyrosine showed significant differences between cases  
178 and controls in the Wilcoxon rank-sum test (Table 2). The same biomarkers, excluding acetate,  
179 and including docosapentaenoic acid % were associated with elevated creatinine

180 concentrations in logistic regression analysis. The best model fit and predictive values (AIC and  
 181 AUC, respectively) were achieved for citrate, followed by phenylalanine/tyrosine and tyrosine.

182 Table 2. Analytes with significant differences between the case and control group according to Wilcoxon rank-sum  
 183 test and logistic regression analysis.

| Group       | Analyte                 | Wilcoxon rank-sum test |        | Logistic regression |       |
|-------------|-------------------------|------------------------|--------|---------------------|-------|
|             |                         | p*                     | p*     | AIC                 | AUC   |
| Citrate     | Citrate                 | < .001                 | < .001 | 96.558              | .9218 |
| Amino acids | Phenylalanine/tyrosine  | < .001                 | < .001 | 177.916             | .8612 |
|             | Tyrosine                | < .001                 | < .001 | 194.418             | .7686 |
|             | BCAA                    | < .001                 | .0074  | 205.218             | .7242 |
|             | Valine                  | < .001                 | .0075  | 205.463             | .7314 |
|             | Leucine                 | .0047                  | .0029  | 203.158             | .7173 |
| Albumin     | Albumin                 | .0098                  | .0029  | 206.526             | .7028 |
| Fatty acids | Linoleic acid %         | < .001                 | < .001 | 194.628             | .7286 |
|             | Docosapentaenoic acid % | .18                    | .0052  | 206.858             | .6421 |
|             | Acetate                 | .0044                  | .58    | 216.289             | .7204 |

184 All p-values are FDR-corrected. The full data with 23 cases and 873 controls was used in both the Wilcoxon rank-  
 185 sum test and logistic regression analysis. The control group represents a routine laboratory sample population.  
 186 \*: significant difference,  $p < .05$ .  
 187 BCAA: branched-chain amino acids.

188 In classification using random forest, the ten biomarkers with the highest variable importance  
 189 were the same biomarkers that reached significance in the Wilcoxon rank-sum test; citrate,  
 190 tyrosine, BCAA, valine, leucine, albumin, acetate, linoleic acid % and the ratio of phenylalanine  
 191 to tyrosine, as well as the amino acid alanine (Fig 2).

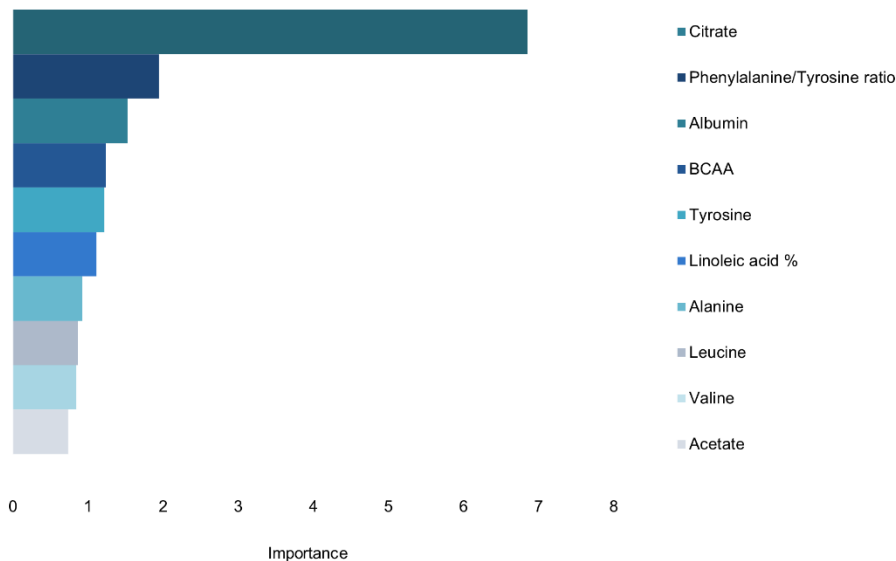

192  
 193 Figure 2. Variable importance in random forest classification using the reduced data. Ten biomarkers with the highest variable  
 194 importance are included in the figure. The higher the variable importance, the more important the feature is in predicting high  
 195 creatinine concentration. Random forest classification was conducted using the reduced data with 23 cases and 127 controls.  
 196 The control group represents a routine laboratory sample population. BCAA: branched-chain amino acids.

197 Since we used different sample sets for different statistical approaches; the full data set for  
198 logistic regression analysis and Wilcoxon rank-sum test, and a reduced data set with randomly  
199 selected samples for random forest classification, we checked whether results of logistic  
200 regression and the Wilcoxon rank-sum test are the same in the full and reduced data sets. Both  
201 data sets gave similar results.

202 The heatmap visualized the aforementioned differences in metabolite levels in case and control  
203 samples, but it also showed large amounts of variability within both the case and control group  
204 samples (Fig 3).

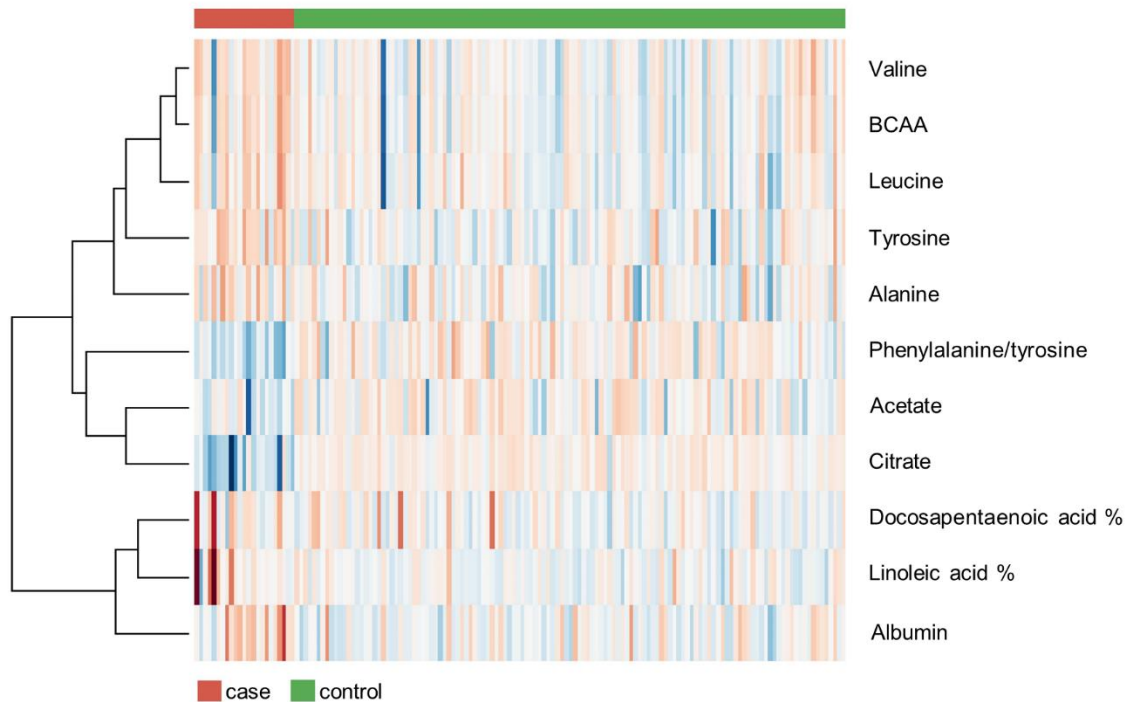

205

206 Figure 3. Heatmap of the reduced data. Metabolites associated with elevated creatinine concentrations according to the  
207 Wilcoxon rank-sum test, logistic regression analysis or random forest classification are included. The heatmap was created  
208 using the reduced data with 23 cases and 127 controls, with normalized and log2-transformed data. The control group  
209 represents a routine laboratory sample population. Each column represents one sample. Columns with a red line on top  
210 represent the case group, and the columns with a green line on top represent the control group. In the subsequent rows, red  
211 hues represent elevated levels and blue hues decreased levels. Color intensity increases proportionally to the magnitude of the  
212 change.

### 213 **Magnitudes of the differences in analyte concentrations: means and histograms**

214 The concentrations of BCAA, leucine, valine, tyrosine, alanine, albumin, docosapentaenoic acid  
215 % and linoleic acid % were lower in the case than control group, whereas mean acetate, citrate  
216 and phenylalanine/tyrosine ratio were higher in the case group (Table 3). The case group's  
217 mean citrate concentration and phenylalanine/tyrosine ratio were higher than the reference  
218 interval of the NMR method, indicating that the mean concentration in the case group is  
219 considered a clinically observable change.

220



221

222 Table 3. Mean concentrations of biomarkers associated with elevated creatinine concentrations according to the  
 223 Wilcoxon rank-sum test, logistic regression analysis or random forest classification.

| Analyte                      | Mean case $\pm$<br>CI         | Mean control $\pm$<br>CI | RI (CI) <sup>10</sup>                      |
|------------------------------|-------------------------------|--------------------------|--------------------------------------------|
| Citrate mmol/l               | .156 $\pm$ .027 <sup>a</sup>  | .077 $\pm$ .001          | .061 (.059 - .063) - .123 (.120 - .125)    |
| Phenylalanine/tyrosine ratio | 1.114 $\pm$ .103 <sup>b</sup> | .794 $\pm$ .013          | .513 (.494 - .530) - 1.049 (1.026 - 1.098) |
| Tyrosine mmol/l              | .052 $\pm$ .005               | .066 $\pm$ .001          | .041 (.039 - .043) - .089 (.086 - .091)    |
| BCAA mmol/l                  | .334 $\pm$ .044               | .394 $\pm$ .006          | .242 (.215 - .251) - .515 (.502 - .531)    |
| Valine mmol/l                | .165 $\pm$ .026               | .195 $\pm$ .003          | .113 (.099 - .119) - .251 (.243 - .261)    |
| Leucine mmol/l               | .109 $\pm$ .013               | .132 $\pm$ .002          | .083 (.078 - .088) - .185(.181 - .189)     |
| Alanine mmol/l               | .356 $\pm$ .043               | .407 $\pm$ .007          | .216 (.199 - .222) - .597 (.580 - .624)    |
| Albumin g/l                  | 27.0 $\pm$ 1.1                | 28.8 $\pm$ .1            | 25.2 (24.2 - 25.7) - 32.4 (32.1 - 32.8)    |
| Linoleic acid %              | 25.6 $\pm$ 1.2                | 27.1 $\pm$ .1            | 24.1 (23.9 - 24.4) - 28.6 (28.4 - 28.7)    |
| Docosapentaenoic acid %      | 1.1 $\pm$ .0                  | 1.3 $\pm$ .0             | 1.1 (1.0 - 1.1) - 2.0 (1.9 - 2.0)          |
| Acetate mmol/l               | .031 $\pm$ .004               | .026 $\pm$ .001          | .021 (.020 - .021) - .037 (.036 - .037)    |

224 The full data with 23 cases and 873 controls was used when calculating case and control group means. The control  
 225 group represents a routine laboratory sample population. Reference intervals represent the reference intervals of the  
 226 NMR method<sup>10</sup>.

227 <sup>a</sup> Analytes mean and 95% CI in the case group higher than the analysis reference interval and its 90% CI.

228 <sup>b</sup> Analytes mean in the case group higher than the analysis reference interval; overlap in analytes 95% CI and  
 229 reference intervals 90% CI.

230 Histograms of the analytes confirmed, that citrate levels and phenylalanine/tyrosine ratio are  
 231 notably higher in samples with elevated creatinine, and often exceed the reference interval (Fig  
 232 4). The dispersion of citrate was high in the case group. The histogram of linoleic acid %  
 233 showed multiple outlier results in the case group, and control group results approached the  
 234 upper reference limit of the analysis. The histogram of acetate suggested, that control group  
 235 results approached the lower analysis reference limit. Although the distribution of albumin  
 236 approached the lower reference limit, certain samples had their albumin concentration near the  
 237 upper reference limit.

238

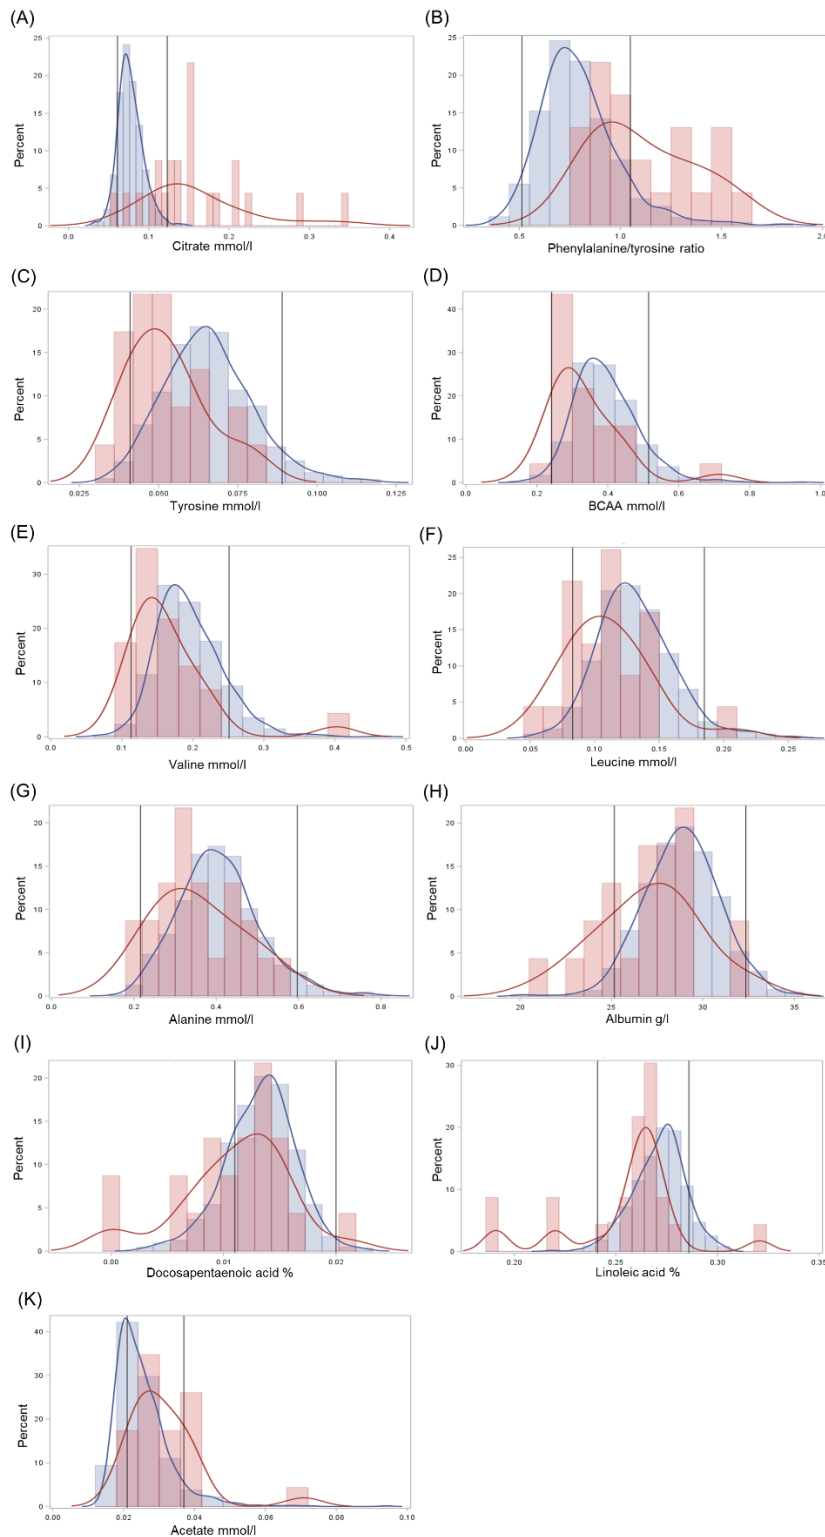

239

240 Figure 1. Figure 4. A-K: Histograms of biomarkers associated with elevated creatinine concentration according to the Wilcoxon  
241 rank-sum test, logistic regression analysis or random forest classification. The full, untransformed data with 23 cases and 873  
242 controls was used to create histograms. The control group represents a routine laboratory sample population. Red lines and  
243 bars: case group. Blue lines and bars: control group. Black lines: reference intervals of the NMR method<sup>10</sup>. BCAA: Branched-  
244 chain amino acids.

## 245 Discussion

246 Impaired renal function is common in dogs, and CKD is a common cause of death among senior  
247 dogs. Blood creatinine measurements are routinely used as a measure of renal function, with  
248 elevated creatinine indicating reduced renal filtration. Systemic metabolic derangements  
249 occurring during impaired renal function have gained attention recently, but have not yet been  
250 extensively studied in dogs, and are therefore not yet utilized in clinical practice. The aim of this  
251 study was to utilize our novel quantitative metabolomics test to identify circulating metabolites  
252 associated with the elevated blood creatinine concentration, and to evaluate their usability in  
253 renal disease management. We discovered a broad-range of physiologically relevant  
254 metabolites, such as citrate, branched-chain amino acids, albumin and fatty acids associated to  
255 reduced renal filtration. These findings may give new insights to compromised renal function  
256 and opportunities for the clinical management of renal diseases.

257 Blood citrate levels were markedly elevated in cases, and showed high dispersion of the results,  
258 suggesting different levels of altered citrate metabolism in these animals. Elevated blood citrate  
259 concentrations have previously been associated with impaired renal function in both humans  
260 and rats<sup>11,12</sup>. The kidneys are responsible for citrate removal from plasma by both urinary  
261 excretion, and renal tubular cell citrate metabolism, which contributes to renal energy supply<sup>13</sup>.  
262 An important determinant of citrate excretion is blood pH, and increased citrate reabsorption can  
263 occur due to acid retention and metabolic acidosis<sup>7,14</sup>. The use of dietary H<sup>+</sup> reduction has been  
264 suggested in CKD patients with reduced citrate excretion<sup>7</sup>.

265 The aromatic amino acids phenylalanine and tyrosine have been associated with CKD<sup>5,9,15</sup>. In  
266 normal conditions, tyrosine is considered a non-essential amino acid, since the body is capable  
267 of forming it sufficiently from phenylalanine. In CKD, however, phenylalanine hydroxylation to  
268 tyrosine can be reduced<sup>5,15</sup>. Insufficient phenylalanine hydroxylation to tyrosine leads to a  
269 decrease in plasma tyrosine concentrations and a normal to slightly increased plasma  
270 concentration of phenylalanine, and an increase in the plasma ratio of phenylalanine to  
271 tyrosine<sup>5,9,16</sup>. These changes were also observed in this study, with the tyrosine concentration  
272 being significantly lower, and the ratio of phenylalanine to tyrosine being significantly higher in  
273 the case than the control group. It has been suggested, that dietary tyrosine supplementation  
274 should be used when renal tyrosine formation is insufficient<sup>6,9</sup>. Further studies are needed to  
275 identify the tyrosine concentrations, which would benefit from tyrosine supplementation.

276 We observed also significantly lower levels of total branched-chain amino acids (BCAA) as well  
277 as the individual BCAAs valine and leucine in dogs with elevated creatinine compared to the  
278 routine laboratory population. The concentrations of BCAA are known to fall in CKD<sup>9,17</sup>,  
279 especially during metabolic acidosis<sup>18,19</sup>. This phenomenon is caused by increased catabolism  
280 of muscle and branched chain amino acids due to the increased activity of liver and muscle  
281 branched-chain keto acid dehydrogenase, with reduced protein intake also contributing to the  
282 condition<sup>20</sup>. This condition can be treated in human medicine by supplementing the low-protein  
283 diet with BCAA or their keto analogues (BCKA)<sup>21,22</sup>. BCAA/BCKA supplementation has also  
284 been suggested for hypoalbuminemic and hypoaminoacidemic dogs, whose condition is not  
285 adequately controlled by routine treatments including clinical renal diets and ACE-inhibitors<sup>8</sup>.

286 Observing both hypo- and hyperalbuminemia in the case group suggests, that both chronic and  
287 acute renal pathologies were included in the case group. Hypoalbuminemia is most commonly  
288 observed in CKD and caused by urinary leakage of albumin. Since albumin is responsible for

289 the maintenance of blood oncotic pressure, severe hypoalbuminemia causes fluid leakage out  
290 of the blood vessels, causing edema or ascites. Proteinuria is one of the assessed parameters  
291 in the IRIS CKD guidelines, and affects treatment of the disease<sup>3,4</sup>. Hyperalbuminemia, on the  
292 other hand, can occur due to polyuria and vomiting, especially when water is withheld, and is a  
293 common feature of AKI. Correction of fluid balance is a vital treatment goal in these patients,  
294 since dehydration can cause ischemic kidney injury.

295 The acetate concentration was significantly higher in case samples than in control samples.  
296 Elevated blood acetate concentrations have previously been observed in a rat model of CKD<sup>12</sup>.  
297 Short-chain fatty acids (SCFA), such as acetate, are organic anions that are largely produced by  
298 gut microbial fermentation<sup>23</sup>. SCFA have immunomodulatory effects<sup>24</sup> and affect renal blood  
299 pressure regulation<sup>25</sup>. Long-term administration of large doses of SCFA has been associated  
300 with the development of ureteritis and hydronephrosis<sup>26</sup>. However, since the control group  
301 acetate concentrations were relatively low in this study, further studies of acetate concentrations  
302 in canine renal disease are warranted.

303 The omega-3 fatty acid docosapentaenoic acid % was significantly lower in case group samples  
304 than in controls. The omega-6 fatty acid linoleic acid % was also significantly lower in case  
305 group, but control group results were slightly skewed towards the upper reference limit of the  
306 analysis, suggesting the possibility of physiological changes in the control group consisting of a  
307 routine laboratory sample population. Omega-3 fatty acids are considered renoprotective,  
308 whereas omega-6 fatty acids are considered detrimental to renal function<sup>27</sup>. Due to their  
309 bioactive role, omega-3 fatty acids are supplemented in functional renal diets<sup>28</sup>. Further studies  
310 are needed to confirm the association of fatty acid levels with the clinical state of the patient.

311 Alanine concentrations were associated with elevated creatinine concentrations, with the case  
312 group having lower alanine concentrations than the control group. Previously, reduced alanine  
313 concentrations have been found in human CKD patients with impaired renal function<sup>29,30</sup>, and  
314 urinary alanine excretion has been associated with proteinuria<sup>30</sup>.

315 Two case group samples exhibited severe hypertriglyceridemia of over 7 mmol/l and were  
316 excluded from further data analyses due to extreme outlier results. Hypercholesterolemia and  
317 mild hypertriglyceridemia are considered components of canine nephrotic syndrome,  
318 characterized by severe proteinuria<sup>31</sup>. In human patients, hyperlipidemia typically occurs also in  
319 CKD patients without proteinuria, and hyperlipidemia has recently been reported in non-  
320 proteinuric dogs with CKD<sup>32</sup>. The development of hyperlipidemia is considered multifactorial;  
321 both reduced fat catabolism and increased hepatic lipoprotein formation to correct low oncotic  
322 pressure are suggested to contribute to this condition<sup>33</sup>. Monitoring of hyperlipidemia is  
323 important in severely hyperlipidemic patients, since it is associated with serious diseases, such  
324 as pancreatitis, vacuolar hepatopathy and gallbladder mucocele<sup>34</sup>. It has been recommended  
325 that persistent, severe hypertriglyceridemia exceeding 5,5 mmol/l should be treated to prevent  
326 these possible complications, however, complications might occur even at lower triglyceride  
327 levels<sup>34</sup>.

328 The major limitation of this study is sample inclusion based only on blood creatinine  
329 concentrations, not the presence of diagnosed renal disease. This approach was taken, since  
330 clinical data was available only for a small minority of the samples. Due to the inclusion criteria,  
331 the case group most likely includes samples with diverse, acute and chronic conditions affecting  
332 renal function. We also could not evaluate the effects of other physiological parameters, such as

333 age and sex, since complete demographic data was lacking from most samples. Using routine  
334 clinical laboratory samples as the control group enabled us to find metabolites differentiating  
335 samples with high creatinine from other diseases. It also allowed us to use samples with similar  
336 sample handling procedures. However, general changes associating with multiple disease  
337 states are not well visualized by this approach, and variability in metabolite results within the  
338 control group was high.

339 In summary, we identified metabolic changes associated with elevated creatinine concentrations  
340 with possible implications on disease diagnostics and management. The quantitative NMR  
341 metabolomics approach is a promising tool for highlighting the metabolic alterations occurring in  
342 renal diseases and monitoring these changes in response to treatment. Further studies with  
343 well-defined clinical cohorts are needed to evaluate, how these changes associate with the  
344 specific clinical status of the canine patients.

### 345 **Acknowledgements**

346 We thank the staff of Movet Ltd. for sample acquisition and coordination of sample flow. The  
347 staff of Kuopion Eläinlääkärikeskus Ltd., and Pieneläinvastaanotto Punaturkki Ltd. are  
348 acknowledged for help in sample handling and acquisition. We thank the customers of Movet  
349 Ltd. for enabling the scientific use of leftover diagnostic sample material. We thank all dog  
350 owners, that participated in the metabolomics clinic pilot for enabling the scientific use of their  
351 dogs' samples and metadata. We thank Kibble Labs Ltd. for NMR analysis of the samples and  
352 MediSapiens Ltd. for sample data management. The canine genetics research group at the  
353 University of Helsinki is thanked for help in sample management. Tuomas Poskiparta and Katja  
354 Jauni are acknowledged for advice and help in project conceptualization. We thank  
355 PetBIOMICS Ltd. and Academy of Finland (308887) for funding the study.

### 356 **Conflicts of interest**

357 The study was funded by PetBIOMICS Ltd and the Academy of Finland (308887). CO is an  
358 employee, KV a previous employee, and HL is an owner and the Chairman of the Board of  
359 PetBIOMICS Ltd. AMM is the CEO, and NH a member of board of Movet Ltd. SS is an owner  
360 and CEO of Kuopion Eläinlääkärikeskus Ltd. LJ is an owner and chairman of board of  
361 Pieneläinvastaanotto Punaturkki Ltd.

### 362 **References**

- 363 1. O'Neill DG, Elliott J, Church DB, McGreevy PD, Thomson PC, Brodbelt DC. Chronic  
364 Kidney Disease in Dogs in UK Veterinary Practices: Prevalence, Risk Factors, and  
365 Survival. *J Vet Intern Med* [Internet]. 2013;27(4):814–21. Available from:  
366 <https://onlinelibrary.wiley.com/doi/abs/10.1111/jvim.12090>
- 367 2. International Renal Interest Society [IRIS]. Grading of Acute Kidney Injury (modified  
368 2016). 2016.
- 369 3. International Renal Interest Society [IRIS]. Treatment recommendations for CKD in Dogs  
370 (modified 2019) [Internet]. 2019. Available from: [http://www.iris-kidney.com/pdf/IRIS-DOG-Treatment\\_Recommendations\\_2019.pdf](http://www.iris-kidney.com/pdf/IRIS-DOG-Treatment_Recommendations_2019.pdf)  
371
- 372 4. International Renal Interest Society [IRIS]. IRIS Staging of CKD (modified 2019). 2019.
- 373 5. Young GA, Parsons FM. Impairment of phenylalanine hydroxylation in chronic renal

- 374 insufficiency. *Clin Sci*. 1973 Jul;45(1):89–97.
- 375 6. Kopple JD. Phenylalanine and tyrosine metabolism in chronic kidney failure. *J Nutr*. 2007  
376 Jun;137(6 Suppl 1):1586S–1590S; discussion 1597S–1598S.
- 377 7. Goraya N, Simoni J, Sager LN, Madias NE, Wesson DE. Urine citrate excretion as a  
378 marker of acid retention in patients with chronic kidney disease without overt metabolic  
379 acidosis. *Kidney Int [Internet]*. 2019 May 1;95(5):1190–6. Available from:  
380 <https://doi.org/10.1016/j.kint.2018.11.033>
- 381 8. Zatelli A, D'Ippolito P, Roura X, Zini E. Short-term effects of dietary supplementation with  
382 amino acids in dogs with proteinuric chronic kidney disease. *Can Vet J = La Rev Vet*  
383 *Can*. 2017 Dec;58(12):1287–93.
- 384 9. Parker VJ, Fascetti AJ, Klamer BG. Amino acid status in dogs with protein-losing  
385 nephropathy. *J Vet Intern Med*. 2019 Mar;33(2):680–5.
- 386 10. Ottka, C., Vapalahti, K., Puurunen, J., Vahtera, L. & Lohi, H. Characteristics of a novel  
387 NMR-based metabolomics platform for dogs. *bioRxiv* (2019). doi:10.1101/871285
- 388 11. Barrios C, Zierer J, Wurtz P, Haller T, Metspalu A, Gieger C, et al. Circulating metabolic  
389 biomarkers of renal function in diabetic and non-diabetic populations. *Sci Rep*. 2018  
390 Oct;8(1):15249.
- 391 12. Kim J-A, Choi H-J, Kwon Y-K, Ryu DH, Kwon T-H, Hwang G-S. 1H NMR-based  
392 metabolite profiling of plasma in a rat model of chronic kidney disease. *PLoS One*.  
393 2014;9(1):e85445.
- 394 13. Simpson DP. Citrate excretion: a window on renal metabolism. *Am J Physiol Physiol*  
395 *[Internet]*. 1983;244(3):F223–34. Available from:  
396 <https://doi.org/10.1152/ajprenal.1983.244.3.F223>
- 397 14. Brennan S, Hering-Smith K, Hamm LL. Effect of pH on citrate reabsorption in the  
398 proximal convoluted tubule. *Am J Physiol*. 1988 Aug;255(2 Pt 2):F301-6.
- 399 15. Wang M, Vyhmeister I, Swendseid ME, Kopple JD. Phenylalanine Hydroxylase and  
400 Tyrosine Aminotransferase Activities in Chronically Uremic Rats. *J Nutr [Internet]*.  
401 1975;105(1):122–7. Available from: <https://doi.org/10.1093/jn/105.1.122>
- 402 16. Fukuda S, Kopple JD. Chronic uremia syndrome in dogs induced with uranyl nitrate.  
403 *Nephron*. 1980;25(3):139–43.
- 404 17. Holecek M, Sprongl L, Tilser I, Tichy M. Leucine and protein metabolism in rats with  
405 chronic renal insufficiency. *Exp Toxicol Pathol*. 2001 Apr;53(1):71–6.
- 406 18. Hara Y, May RC, Kelly RA, Mitch WE. Acidosis, not azotemia, stimulates branched-chain,  
407 amino acid catabolism in uremic rats. *Kidney Int*. 1987 Dec;32(6):808–14.
- 408 19. May RC, Masud T, Logue B, Bailey J, England BK. Metabolic acidosis accelerates whole  
409 body protein degradation and leucine oxidation by a glucocorticoid-dependent  
410 mechanism. *Miner Electrolyte Metab*. 1992;18(2–5):245–9.
- 411 20. Holecek M. Branched-chain amino acids in health and disease: metabolism, alterations in  
412 blood plasma, and as supplements. *Nutr Metab (Lond)*. 2018;15:33.
- 413 21. Cupisti A, Brunori G, Di Iorio BR, D'Alessandro C, Pasticci F, Cosola C, et al. Nutritional  
414 treatment of advanced CKD: twenty consensus statements. *J Nephrol*. 2018

- 415 Aug;31(4):457–73.
- 416 22. Aparicio M, Bellizzi V, Chauveau P, Cupisti A, Ecdet T, Fouque D, et al. Protein-restricted  
417 diets plus keto/amino acids--a valid therapeutic approach for chronic kidney disease  
418 patients. *J Ren Nutr.* 2012 Mar;22(2 Suppl):S1-21.
- 419 23. Buckley BM, Williamson DH. Origins of blood acetate in the rat. *Biochem J.* 1977  
420 Sep;166(3):539–45.
- 421 24. Park J, Kim M, Kang SG, Jannasch AH, Cooper B, Patterson J, et al. Short-chain fatty  
422 acids induce both effector and regulatory T cells by suppression of histone deacetylases  
423 and regulation of the mTOR-S6K pathway. *Mucosal Immunol.* 2015 Jan;8(1):80–93.
- 424 25. Pluznick JL, Protzko RJ, Gevorgyan H, Peterlin Z, Sipos A, Han J, et al. Olfactory  
425 receptor responding to gut microbiota-derived signals plays a role in renin secretion and  
426 blood pressure regulation. *Proc Natl Acad Sci U S A.* 2013 Mar;110(11):4410–5.
- 427 26. Park J, Goergen CJ, HogenEsch H, Kim CH. Chronically Elevated Levels of Short-Chain  
428 Fatty Acids Induce T Cell-Mediated Ureteritis and Hydronephrosis. *J Immunol.* 2016  
429 Mar;196(5):2388–400.
- 430 27. Brown SA, Brown CA, Crowell WA, Barsanti JA, Allen T, Cowell C, et al. Beneficial  
431 effects of chronic administration of dietary omega-3 polyunsaturated fatty acids in dogs  
432 with renal insufficiency. *J Lab Clin Med.* 1998 May;131(5):447–55.
- 433 28. Hall JA, Yerramilli M, Obare E, Yerramilli M, Panickar KS, Bobe G, et al. Nutritional  
434 Interventions that Slow the Age-Associated Decline in Renal Function in a Canine  
435 Geriatric Model for Elderly Humans. *J Nutr Health Aging.* 2016;20(10):1010–23.
- 436 29. Li R, Dai J, Kang H. The construction of a panel of serum amino acids for the  
437 identification of early chronic kidney disease patients. *J Clin Lab Anal.* 2018 Mar;32(3).
- 438 30. Durantou F, Lundin U, Gayraud N, Mischak H, Aparicio M, Mourad G, et al. Plasma and  
439 urinary amino acid metabolomic profiling in patients with different levels of kidney  
440 function. *Clin J Am Soc Nephrol.* 2014 Jan;9(1):37–45.
- 441 31. Bauer JE. Lipoprotein-mediated transport of dietary and synthesized lipids and lipid  
442 abnormalities of dogs and cats. *J Am Vet Med Assoc.* 2004 Mar;224(5):668–75.
- 443 32. Behling-Kelly E. Serum lipoprotein changes in dogs with renal disease. *J Vet Intern Med.*  
444 2014;28(6):1692–8.
- 445 33. Thrall MA, Weiser G, Allison RW, Campbell TW. *Veterinary Hematology and Clinical  
446 Chemistry.* 2nd ed. Wiley-Blackwell; 2012.
- 447 34. Xenoulis PG, Steiner JM. Canine hyperlipidaemia. *J Small Anim Pract.* 2015  
448 Oct;56(10):595–605.

449
